# Supplementary figures and images for: Field Observations and Genetic Characterization of Sheep-Associated Malignant Catarrhal Fever in Egypt, 2018
Source: MDPI journal article supplement (doi:10.3390/vetsci7040201), 2020-12-11

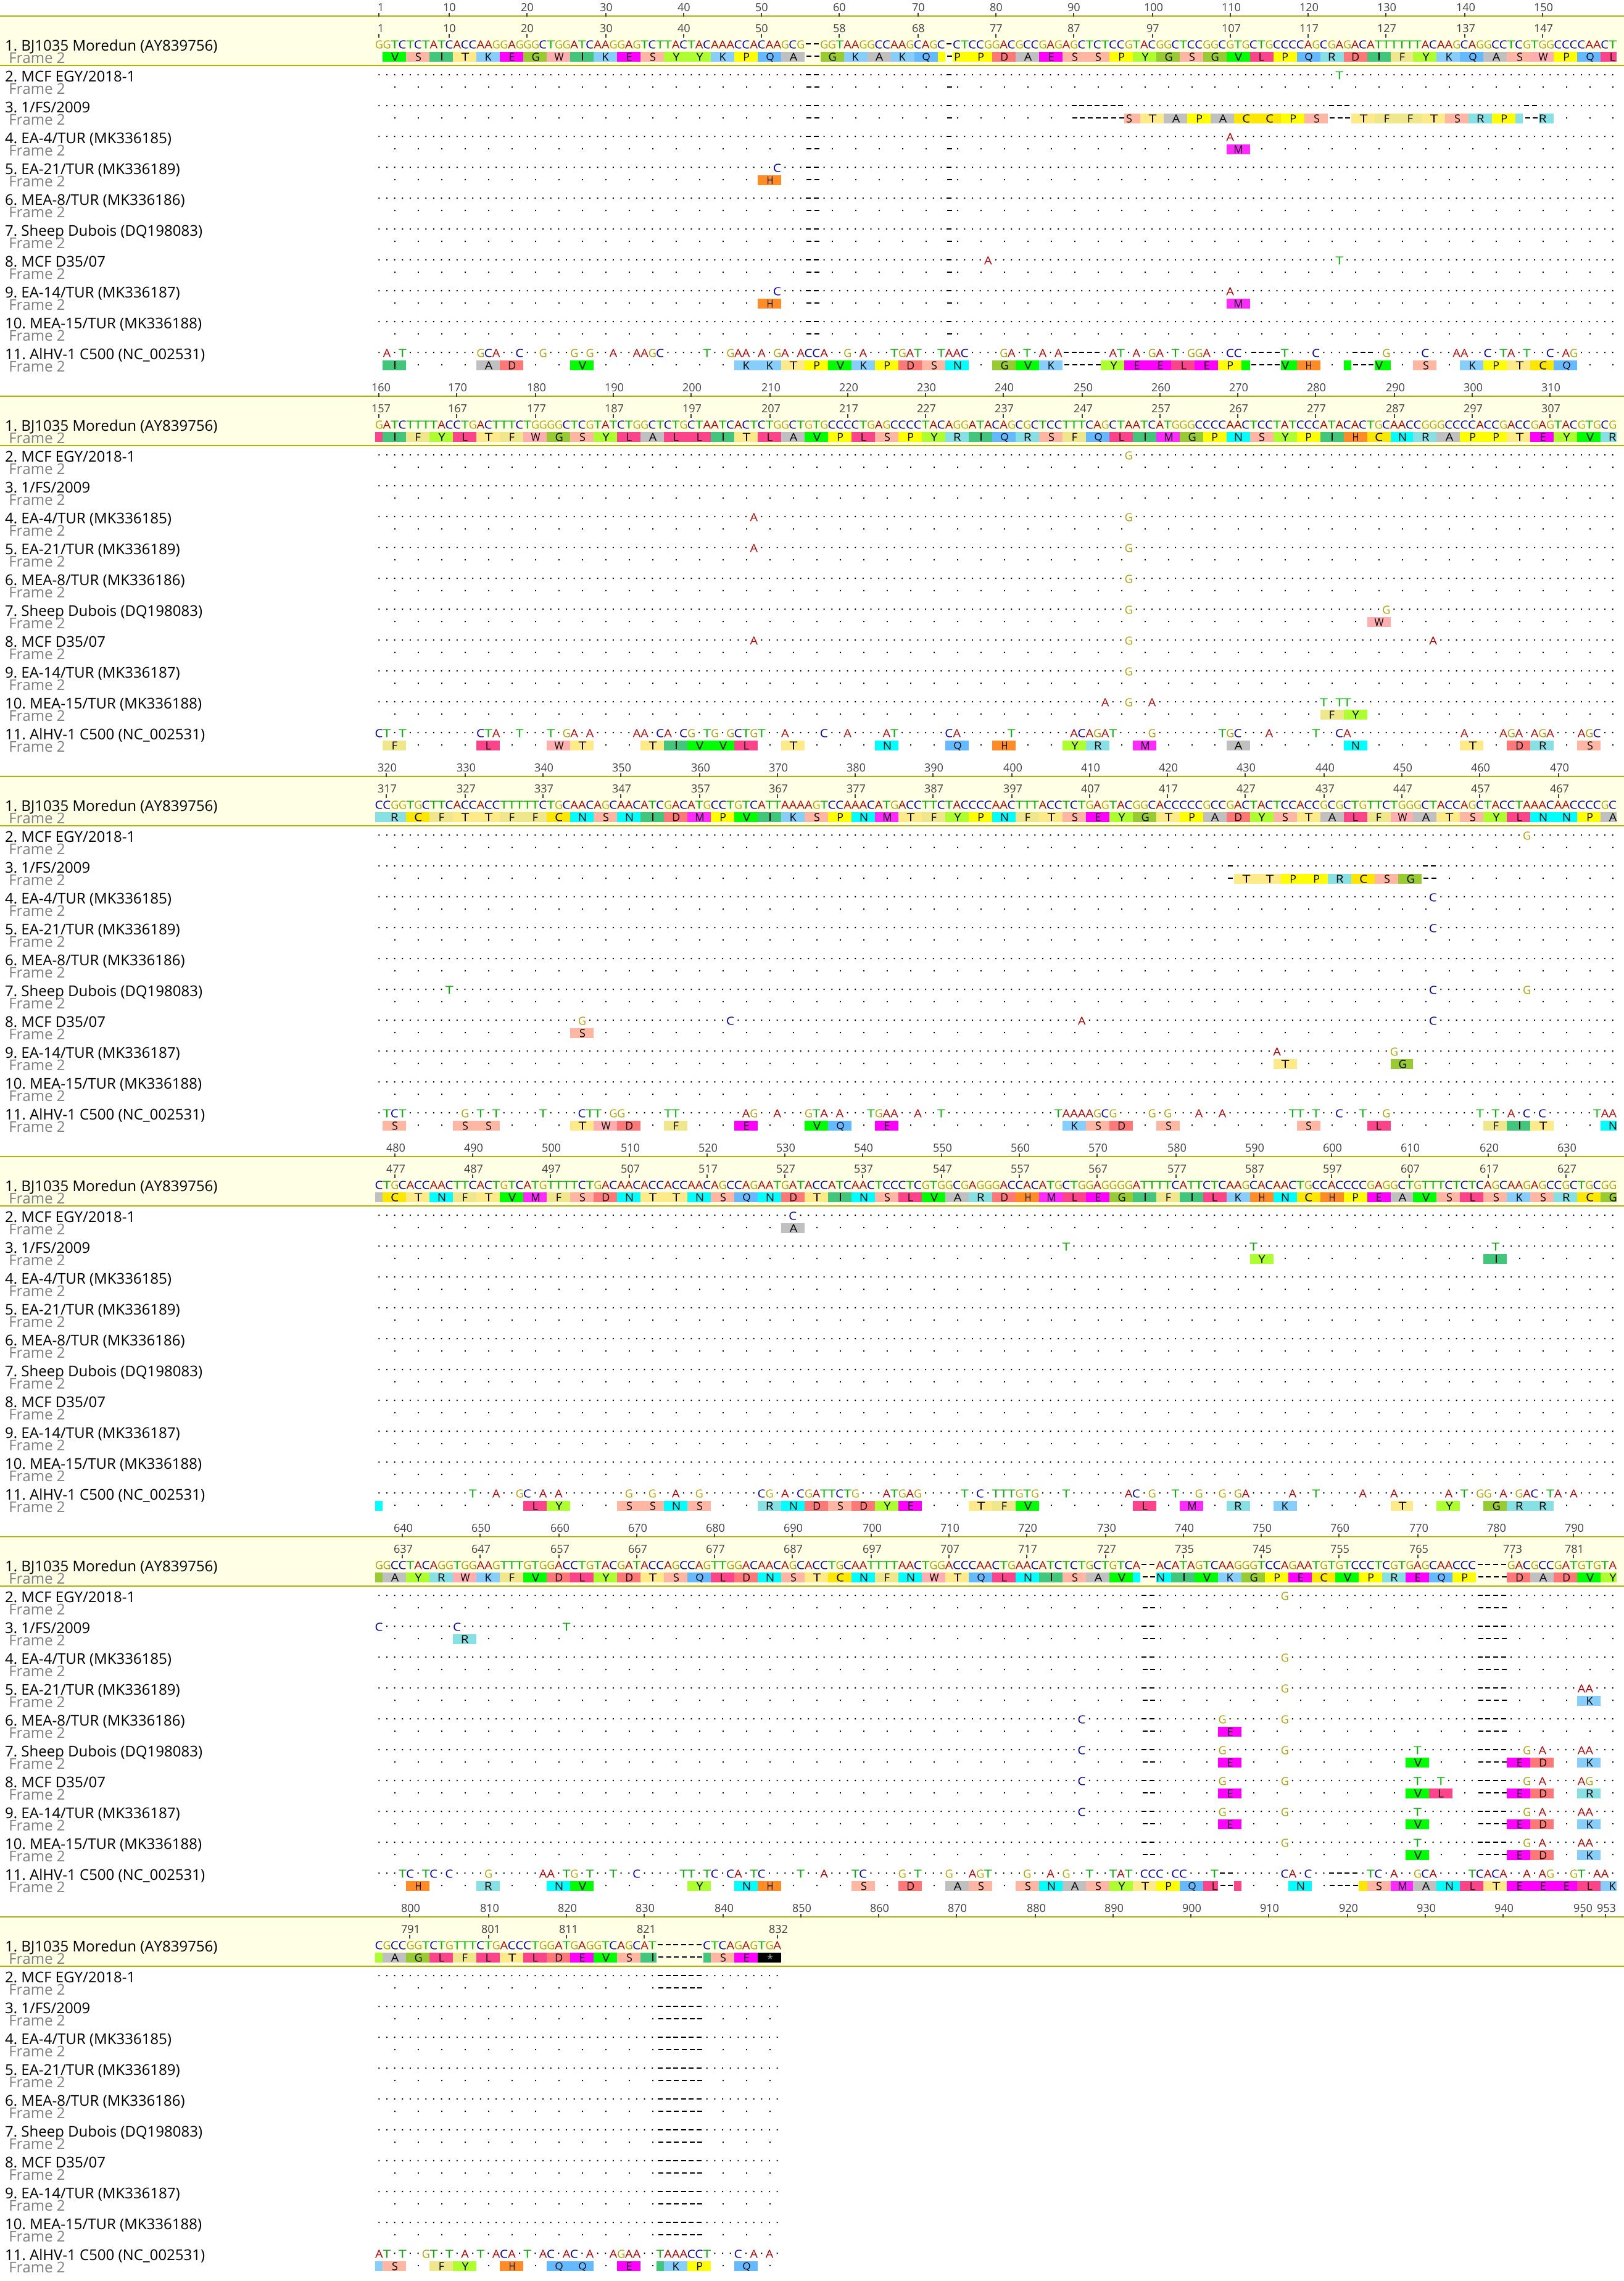

Supplement: s1 [file s1]
